# Supplementary material for: The impact of minimally-invasive esophagectomy operative duration on post-operative outcomes
Source: Front Surg. 2024 Feb 19;11:1348942. doi: 10.3389/fsurg.2024.1348942 (PMC10909993; doi:10.3389/fsurg.2024.1348942)
Supplement: Supplementary file 1 [file Table1.xlsx]

## Sheet: Sheet1
Supplementary Table 1. Correlation Between Increasing Operative Duration & Post-Op Outcomes
Total	n=297
	r	p
Post-Op Complications
AKI	0.02	0.69
Peri-Op MI	-0.05	0.39
New A.Fib	0.06	0.28
Respiratory Infection	0.11	0.05
Anastomotic Leak	0.17	0.003
Conduit Necrosis	0.1	0.08
SSI	0.08	0.17
Readmissions
ED	0.01	0.86
Hospital Inpatient	0.05	0.41
Mortality
30-Day	-0.02	0.77
90-Day	-0.01	0.78
1-Year	0.13	0.03
