# Supplementary material for: The impact of minimally-invasive esophagectomy operative duration on post-operative outcomes
Source: Front Surg. 2024 Feb 19;11:1348942. doi: 10.3389/fsurg.2024.1348942 (PMC10909993; doi:10.3389/fsurg.2024.1348942)
Supplement: Supplementary file 2 [file Table2.xlsx]

## Sheet: Sheet1
Supplementary Table 2. Participant Demographic & Clinical Characteristics by Operative Time <4 Hours and >4 Hours
	<4 Hours	>4 Hours
Patient Characteristics	n=100	n=197
Total	n (%)	n (%)	p
Sociodemographic Variables
Agea	68.4 [61.6-72.3]	65.7 [59.4-71.7]	0.05
Female	19 (19.0%)	39 (19.8%)	0.87
Race/Ethnicity			0.73
Asian/Pacific Islander	7 (7.0%)	19 (9.6%)
Black	3 (3.0%)	9 (4.6%)
Hispanic/Latinx	9 (9.0%)	24 (12.2%)
White	77 (77.0%)	138 (70.1%)
Other	4 (4.0%)	7 (3.6%)
Clinical Variables
BMI			0.001
<19	5 (5.0%)	6 (3.0%)
19-30	79 (79.0%)	120 (60.9%)
>30	16 (16.0%)	71 (36.0%)
CCI			0.53
0	50 (50.0%)	92 (46.7%)
1-2	37 (37.0%)	66 (33.5%)
3-4	8 (8.0%)	26 (13.2%)
5+	5 (5.0%)	13 (6.6%)
Prior CT Surgery	1 (1.0%)	12 (6.1%)	0.04
Cancer Variables
Histology			0.38
Adenocarcinoma	78 (78.0%)	161 (81.7%)
Squamous	18 (18.0%)	33 (16.8%)
Other	4 (4.0%)	3 (1.5%)
Clinical Stage			0.18
I	9 (9.0%)	22 (11.2%)
II	18 (18.0%)	52 (26.4%)
III+	73 (73.0%)	123 (62.4%)
Pathologic Stage			0.16
0	6 (6.0%)	22 (11.2%)
I	47 (47.0%)	72 (36.5%)
II	14 (14.0%)	42 (21.3%)
III	30 (30.0%)	51 (25.9%)
IV	3 (3.0%)	10 (5.1%)
Treatment Variables
Neoadjuvant Therapy
Chemotherapy	91 (91.0%)	175 (88.8%)	0.56
Radiation	89 (89.0%)	162 (82.2%)	0.13
Surgical Technique			0.003
Ivor Lewis	89 (89.0%)	148 (75.1%)
McKeown	4 (4.0%)	6 (3.1%)
Transhiatal	7 (7.0%)	43 (21.8%)
Surgical Approach			0.28
Total MIE	97 (97.0%)	191 (97.0%)
Hybrid MIE (Open Abdomen)	3 (3.0%)	6 (3.1%)
aMedian [IQR]
